# Supplementary material for: Cold argon plasmas for non-enzymatic digestion of macromolecules
Source: Royal Society of Chemistry journal article supplement (doi:10.1039/d5cc06333g), 2025-12-02
Supplement: d5cc06333g1.pdf [file d5cc06333g1.pdf]

## Electronic Supplementary information

### Experimental

#### Chemicals and standards

LC-grade solvents (water, acetonitrile, methanol, ethanol) were purchased from Merck. Leucine enkephalin was purchased from Waters UK (Waters Corporation, Wilmslow, UK). Formic acid, bradykinin, angiotensin I, ubiquitin, beta-casein, and haemoglobin standards were purchased from Merck.

#### Radiofrequency-argon plasma

A custom handpiece (Ambimass, HU) with a corona pin was connected to a ForceTriad™ Energy Platform (Medtronic, Minneapolis, USA). The return electrode (Medtronic) was placed under a rubber return pad, with glass slides placed on top of the pad. The generator was run in 'coag spray' mode at power level 120 (representing approximately 5 kV peak to peak), and the distance between the corona pin tip and the glass slide was 12 mm. The activation of the device with 0.1 bar argon flowing generated a purple plasma, which covered a roughly 30 mm diameter area directly below the corona tip. Aqueous standards (1 µL at a concentration of 1 mg/mL) were applied to glass slides and allowed to dry. Leucine enkephalin was exposed to the plasma for 30 seconds continuously. Plasma was applied to ubiquitin, angiotensin I, beta-casein, and haemoglobin in pulses of around 1 Hz for 30 seconds. Standards were then dissolved in 3x20 µL 0.1% formic acid in water and stored in low volume insert vials before injection by LC-MS.

#### Mass spectrometry

LC-MS experiments were carried out using a Waters Acquity M-Class system (Waters Corporation, Wilmslow, UK) coupled to a Bruker 7T solariX FT-ICR (Bruker Daltonics, Bremen, DE; resolving power  $\approx$  80,000 FWHM at 662 m/z) in positive mode. 1 µL of sample was loaded onto a Kinetex 2.6 µm 100 Å XB-C18 150 x 0.3 mm column (Phenomenex, Torrance, US), with solvent A being 0.1% formic acid in water and solvent B being 0.1% formic acid in acetonitrile. The chromatography followed a 30 minute gradient at 10 µL/min, beginning at 3% solvent B and ramping to 60% over 20 minutes, followed by a 2 minute flush at 80% solvent B and a re-equilibration of 3% solvent B for 8 minutes.

Direct infusion and CID MS/MS experiments were carried out using a Bruker TIMS-ToF fleX (Bruker Daltonics, Bremen, DE; resolving power  $\approx$  45,000 FWHM at 556 m/z) in positive mode. For CID, the isolation window was 0.5 m/z and the collision energy was 25 eV.

Data was analysed in Compass DataAnalysis (Bruker). Chromatograms were integrated and mass lists generated using the SNAP algorithm. Identified peaks were then annotated using Protein Prospector (UCSF, <http://prospector.ucsf.edu>) for terminal ions, and with an in-house script for internal ions.

| <i>Time</i> | <i>Solvent A (H<sub>2</sub>O)</i> | <i>Solvent B (ACN)</i> |
|-------------|-----------------------------------|------------------------|
| 0.00        | 97                                | 3                      |
| 20.00       | 40                                | 60                     |
| 20.01       | 20                                | 80                     |
| 22.00       | 97                                | 3                      |
| 30          | 97                                | 3                      |

LC-MS gradient for all experiments.

For ECD of haemoglobin, a 5 mg/mL solution of haemoglobin in 50% acetonitrile with 0.1% formic acid was injected by direct infusion at a rate of 2 µL/min. ECD pulses were applied for 0.006 seconds. For ECD of ubiquitin, a 1 mg/mL solution of ubiquitin in 50% acetonitrile with 0.1% formic acid was injected by direct infusion at a rate of 2 µL/min. ECD pulses were applied for 0.03 seconds.

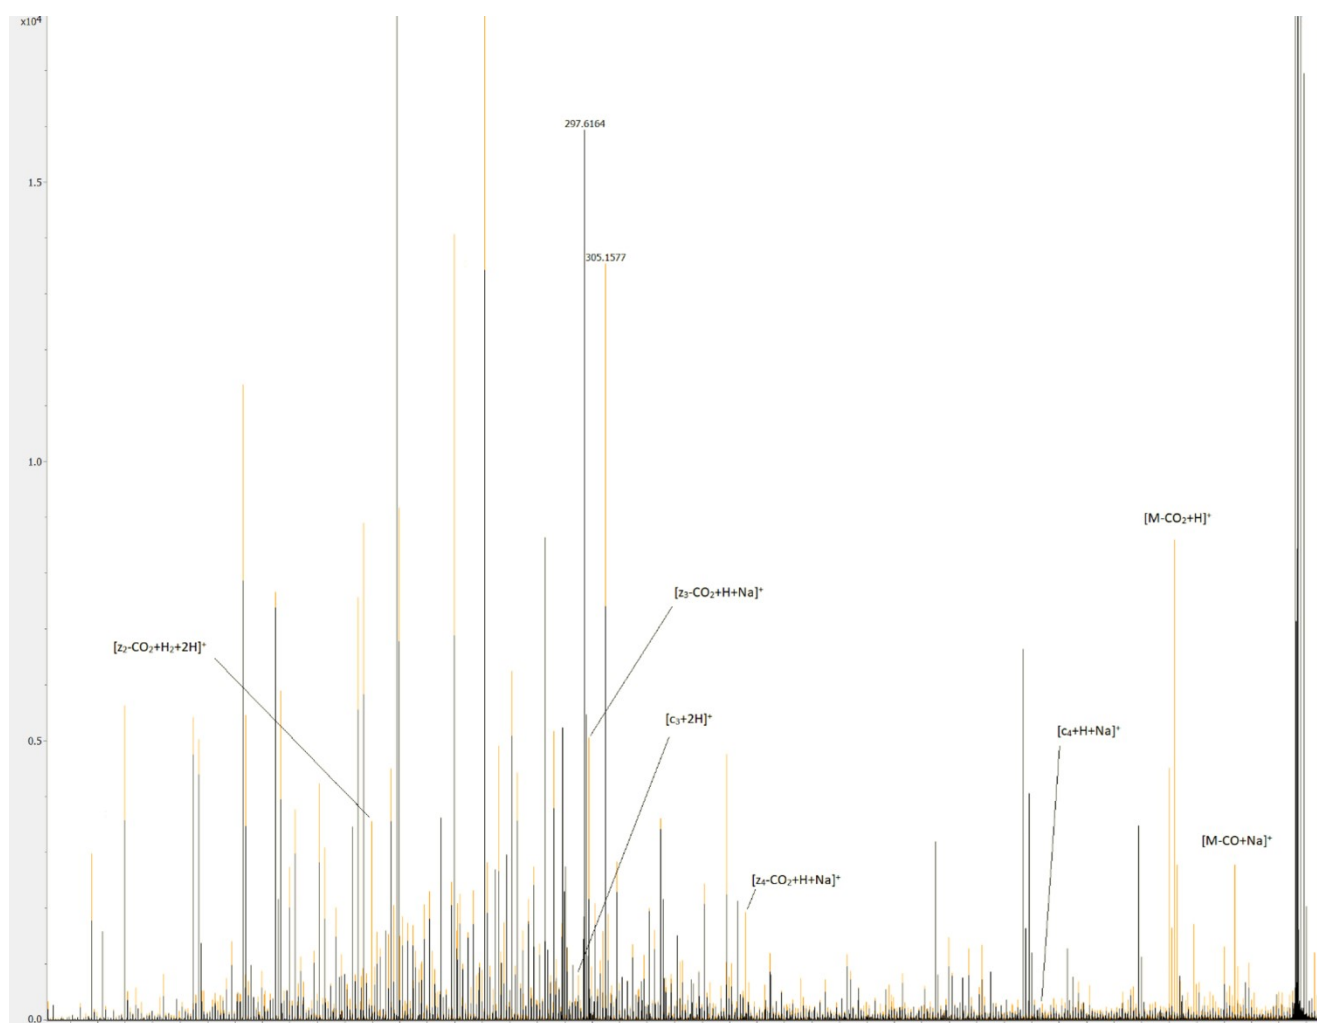

Supplementary 1.1: Overlaid direct infusion mass spectra of leucine enkephalin after exposure to the radiofrequency cold argon plasma. The control spectrum is black and the 30 second exposure spectrum is orange.

**Data**

| Peak   | Error<br>(ppm) | Annotation                                                         | 0 s   | 5 s   | 30 s  | 60 s  |
|--------|----------------|--------------------------------------------------------------------|-------|-------|-------|-------|
| 556.28 | -0.50          | [M+H] <sup>+</sup>                                                 | 2.9e5 | 5.3e5 | 2.7e5 | 5.4e4 |
| 550.26 | -3.63          | [M-CO+Na] <sup>+</sup>                                             | -     | 5.3e2 | 5.6e2 | -     |
| 534.27 | -0.19          | [M-CO <sub>2</sub> +Na] <sup>+</sup>                               | -     | 6.7e2 | 1.2e3 | 1.4e2 |
| 532.25 | 1.88           | [M-CO <sub>2</sub> -H <sub>2</sub> +Na] <sup>+</sup>               | -     | 1.9e2 | 2.7e2 | -     |
| 528.28 | 1.89           | [M-CO+H] <sup>+</sup>                                              | -     | 1.8e2 | 1.5e2 | 3.7e1 |
| 512.29 | 0.59           | [M-CO <sub>2</sub> +H] <sup>+</sup>                                | -     | 3.0e3 | 3.0e3 | 9.1e2 |
| 510.27 | 0.20           | [M-CO <sub>2</sub> -H <sub>2</sub> +H] <sup>+</sup>                | -     | 2.2e3 | 1.7e3 | 4.8e2 |
| 464.19 | 0.00           | [c <sub>4</sub> +H+Na] <sup>+</sup>                                | -     | 2.7e2 | 3.8e2 | 2.4e1 |
| 442.21 | 0.00           | [c <sub>4</sub> +2H] <sup>+</sup>                                  | 1.9e1 | 1.5e3 | 1.3e3 | 1.6e2 |
| 400.18 | 2.25           | [z <sub>4</sub> +Na] <sup>+</sup>                                  | 6.0e0 | 4.8e2 | 6.1e2 | 2.1e1 |
| 356.19 | 0.28           | [z <sub>4</sub> -CO <sub>2</sub> +H+Na] <sup>+</sup>               | -     | 1.9e3 | 4.3e3 | -     |
| 332.20 | -3.91          | [z <sub>4</sub> -CO <sub>2</sub> +2H] <sup>+</sup>                 | -     | 2.0e2 | 2.3e2 | -     |
| 299.17 | 1.00           | [z <sub>3</sub> -CO <sub>2</sub> +H+Na] <sup>+</sup>               | -     | 3.2e3 | 8.0e3 | -     |
| 295.14 | 1.69           | [c <sub>3</sub> +2H] <sup>+</sup>                                  | -     | 1.3e3 | 1.2e3 | 8.4e1 |
| 277.19 | -1.44          | [z <sub>3</sub> -CO <sub>2</sub> +2H] <sup>+</sup>                 | -     | 9.2e2 | 1.2e3 | 3.1e1 |
| 264.16 | -1.89          | [z <sub>2</sub> +2H] <sup>+</sup>                                  | -     | 1.4e2 | 1.0e2 | -     |
| 242.15 | -0.83          | [z <sub>2</sub> -CO <sub>2</sub> +H+Na] <sup>+</sup>               | -     | 6.2e2 | 1.9e3 | 1.1e2 |
| 238.12 | 2.52           | [c <sub>2</sub> +2H] <sup>+</sup>                                  | -     | 9.4e2 | 1.0e3 | -     |
| 235.18 | 2.55           | [y <sub>2</sub> -CO <sub>2</sub> +2H] <sup>+</sup>                 | -     | 3.8e2 | 3.5e2 | 3.3e1 |
| 220.17 | -1.36          | [z <sub>2</sub> -CO <sub>2</sub> +2H] <sup>+</sup>                 | 1.5e1 | 8.5e2 | 1.2e3 | 1.8e2 |
| 218.15 | 4.13           | [z <sub>2</sub> -CO <sub>2</sub> -H <sub>2</sub> +2H] <sup>+</sup> | -     | 1.9e2 | 2.0e2 | 7.0e1 |
| 193.10 | 4.14           | [a <sub>2</sub> ] <sup>+</sup>                                     | -     | 1.4e2 | 1.5e2 | 3.0e1 |
| 122.10 | -4.10          | [Phe-CO <sub>2</sub> +H] <sup>+</sup>                              | 9.0e0 | 4.3e1 | 3.0e1 | 1.8e1 |

Supplementary 1.2: Notable fragments, their annotations, and their absolute intensities from direct infusion analysis of leucine-enkephalin exposed to the RF-AP source. Mass error is calculated from the 30s peak.

| Peak    | Error (ppm) | Annotation                             | Control | 5 secs | 30 secs | 1 min |
|---------|-------------|----------------------------------------|---------|--------|---------|-------|
| 1060.57 | -1.23       | [M+H] <sup>+</sup>                     | 5.1e5   | 4.3e3  | 9.0e2   | 5.1e2 |
| 530.79  | -1.88       | [M+2H] <sup>2+</sup>                   | 1.3e6   | 3.1e5  | 1.0e5   | 5.4e5 |
| 572.33  | -3.49       | [c <sub>5</sub> +2H] <sup>+</sup>      | 2.0e2   | 6.8e2  | 4.1e2   | 1.2e3 |
| 491.26  | -2.85       | [z <sub>4</sub> +2H] <sup>+</sup>      | 1.6e2   | 5.0e2  | 2.9e2   | 7.1e2 |
| 452.25  | -0.44       | [c <sub>8</sub> +3H] <sup>2+</sup>     | -       | 2.9e2  | 1.2e2   | 3.8e2 |
| 447.27  | -3.35       | [z <sub>4</sub> -COOH+3H] <sup>+</sup> | -       | 1.9e3  | 9.9e2   | 4.2e3 |
| 425.26  | -4.23       | [c <sub>4</sub> +2H] <sup>+</sup>      | 2.0e2   | 3.5e2  | 3.3e2   | 7.2e2 |
| 378.71  | -2.11       | [c <sub>7</sub> +3H] <sup>2+</sup>     | 5.2e1   | 1.6e2  | 1.3e2   | 4.3e2 |
| 307.18  | -3.58       | [z <sub>2</sub> +2H] <sup>+</sup>      | -       | 1.2e2  | 2.7e1   | 1.9e2 |
| 297.66  | -3.36       | [c <sub>5</sub> +2H+Na] <sup>2+</sup>  | 1.4e1   | 2.6e1  | 1.9e1   | 4.6e1 |
| 286.67  | -2.09       | [c <sub>5</sub> +3H] <sup>2+</sup>     | 2.3e1   | 1.7e2  | 1.4e2   | 4.5e2 |

Supplementary 1.3: Notable fragments, their annotations, and their absolute intensities from direct infusion analysis of bradykinin exposed to the RF-AP source. Mass error is calculated from the 30s peak.

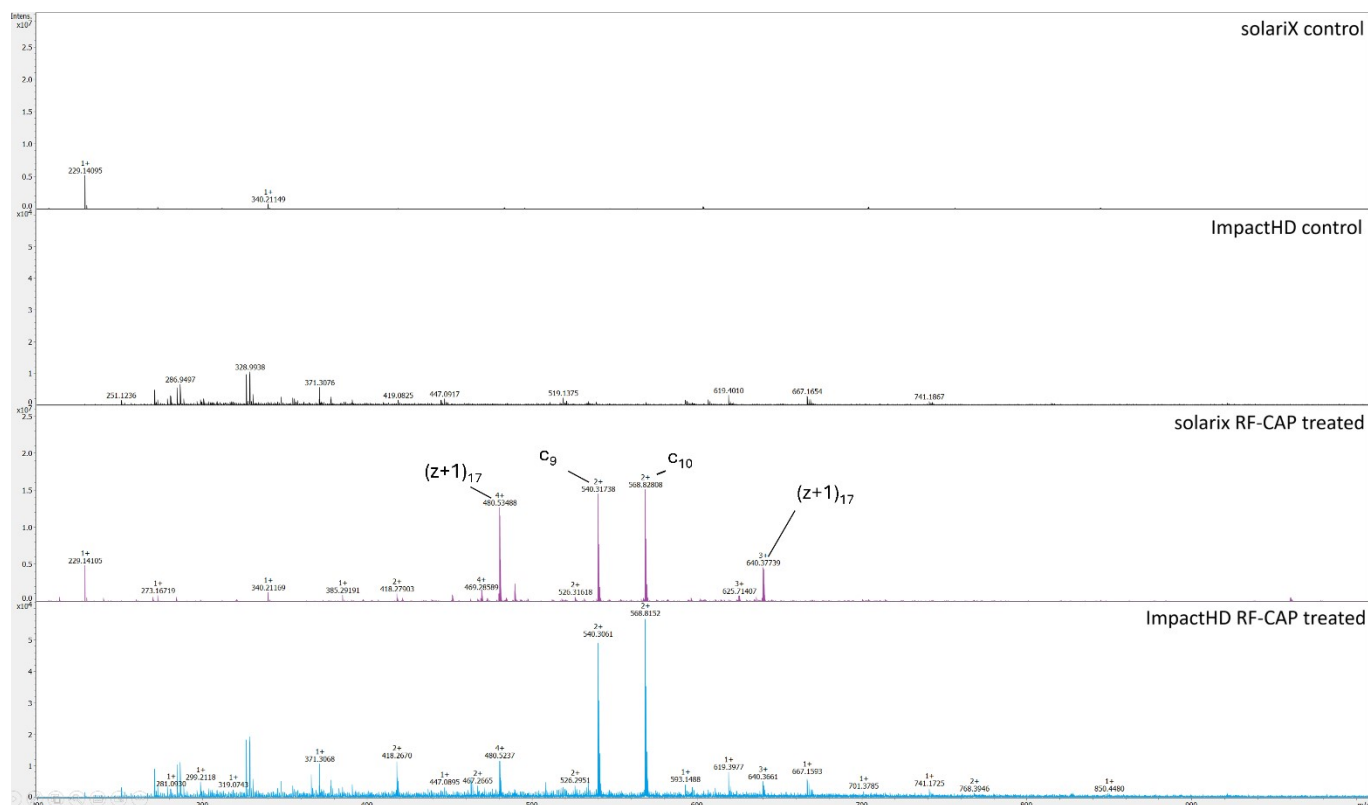

Supplementary 1.4: Mass spectra showing analytes eluting at ~8.0-8.5 minute retention time for ubiquitin control (top) and after exposure to plasma (bottom). The purple spectrum was recorded on a Bruker 7T solarix FT-ICR, and the blue spectrum was recorded on a Bruker Impact HD (Bruker Daltonics, Bremen, DE; resolving power  $\approx 8500$  FWHM at 540 m/z) approximately four months later. Peaks at 480.5, 540.3, 568.8, and 640.4 are annotated as (z+1)<sub>17</sub>, c<sub>9</sub>, c<sub>10</sub>, and (z+1)<sub>17</sub> respectively.

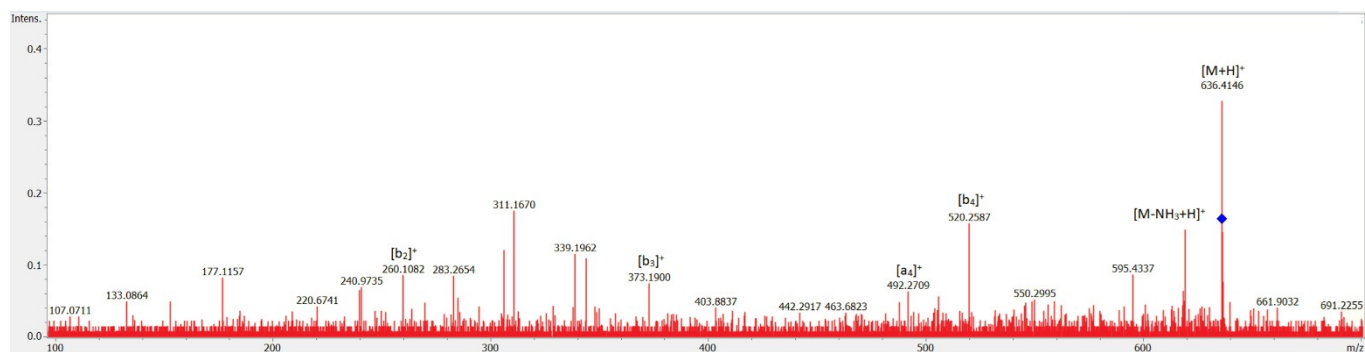

Supplementary 1.5: Annotated CID spectrum of plasma-exposed ubiquitin product peak at 636.35 m/z (annotated as  $[c_5+2H]^+$ ). A series of b-ions is identifiable.

| Concentration (nM) | $[z_8+3H]_{2+}$ | $[c_{10}+2H]^2_+$ | $[c_{14}+2H]^3_+$ | $[c_{15}+2H]^3_+$ |
|--------------------|-----------------|-------------------|-------------------|-------------------|
| 973                | 243405          | 194389            | 126723            | 100475            |
| 973                | 168084          | 205313            | 103583            | 77128             |
| 973                | 201300          | 139396            | 115893            | 60751             |
| 778                | 163944          | 179527            | 104009            | 58567             |
| 778                | 316045          | 273297            | 226781            | 106044            |
| 778                | 259876          | 235129            | 169428            | 85119             |
| 584                | 162294          | 103563            | 41859             | 20576             |
| 584                | 133998          | 105004            | 90514             | 36045             |
| 584                | 130032          | 85741             | 48307             | 29108             |
| 389                | 39971           | 40882             | 0                 | 0                 |
| 389                | 89225           | 45814             | 24688             | 0                 |
| 389                | 28180           | 0                 | 0                 | 0                 |
| 195                | 0               | 0                 | 0                 | 0                 |
| 195                | 0               | 0                 | 0                 | 0                 |
| 195                | 44819           | 33179             | 28645             | 0                 |
| 175                | 0               | 0                 | 0                 | 0                 |
| 175                | 0               | 0                 | 0                 | 0                 |
| 175                | 0               | 0                 | 0                 | 0                 |

Supplementary 1.6a: Concentration curve demonstrating intensities of selected fragments. Fragments were not detected below 195 nM (195 fmol injection on column).

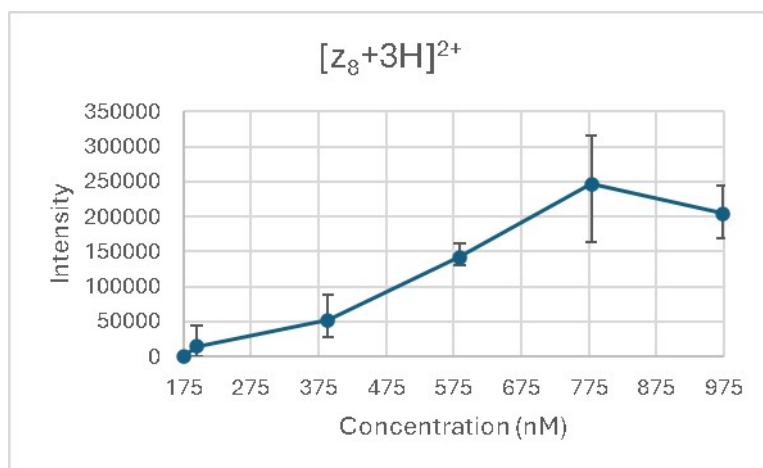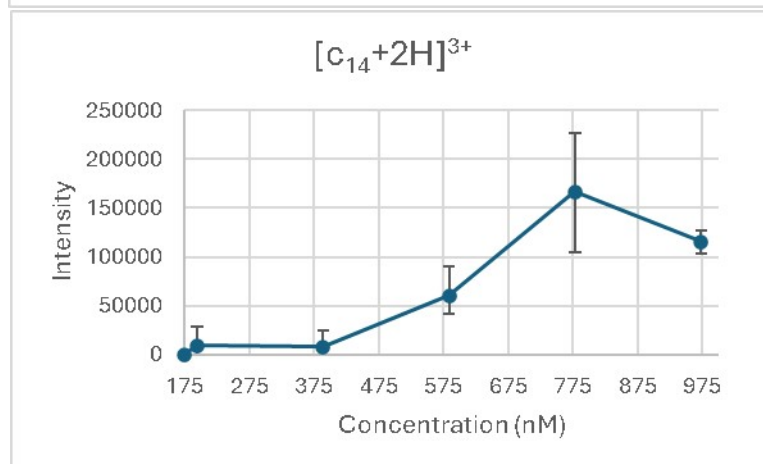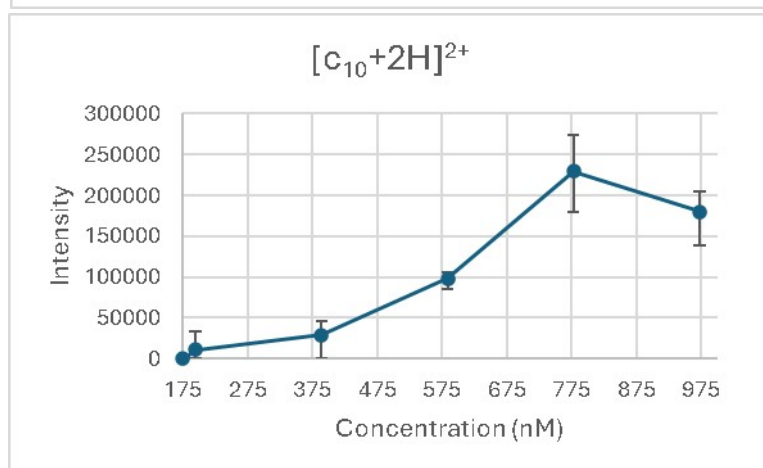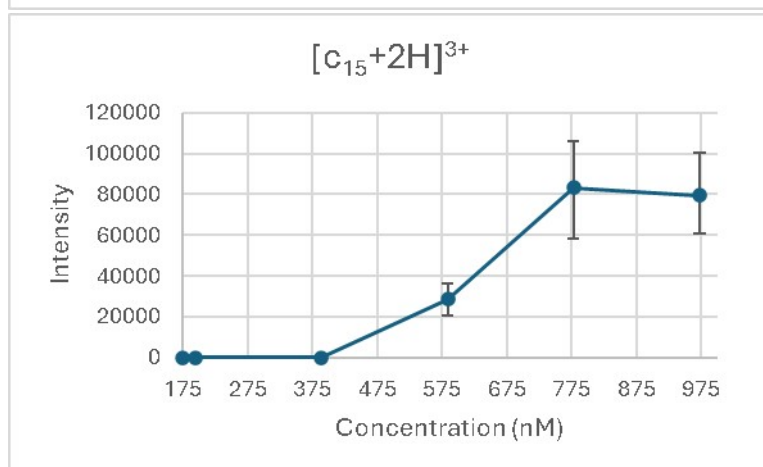

Supplementary 1.6b: Average intensity graphs of selected fragments in concentration curve.



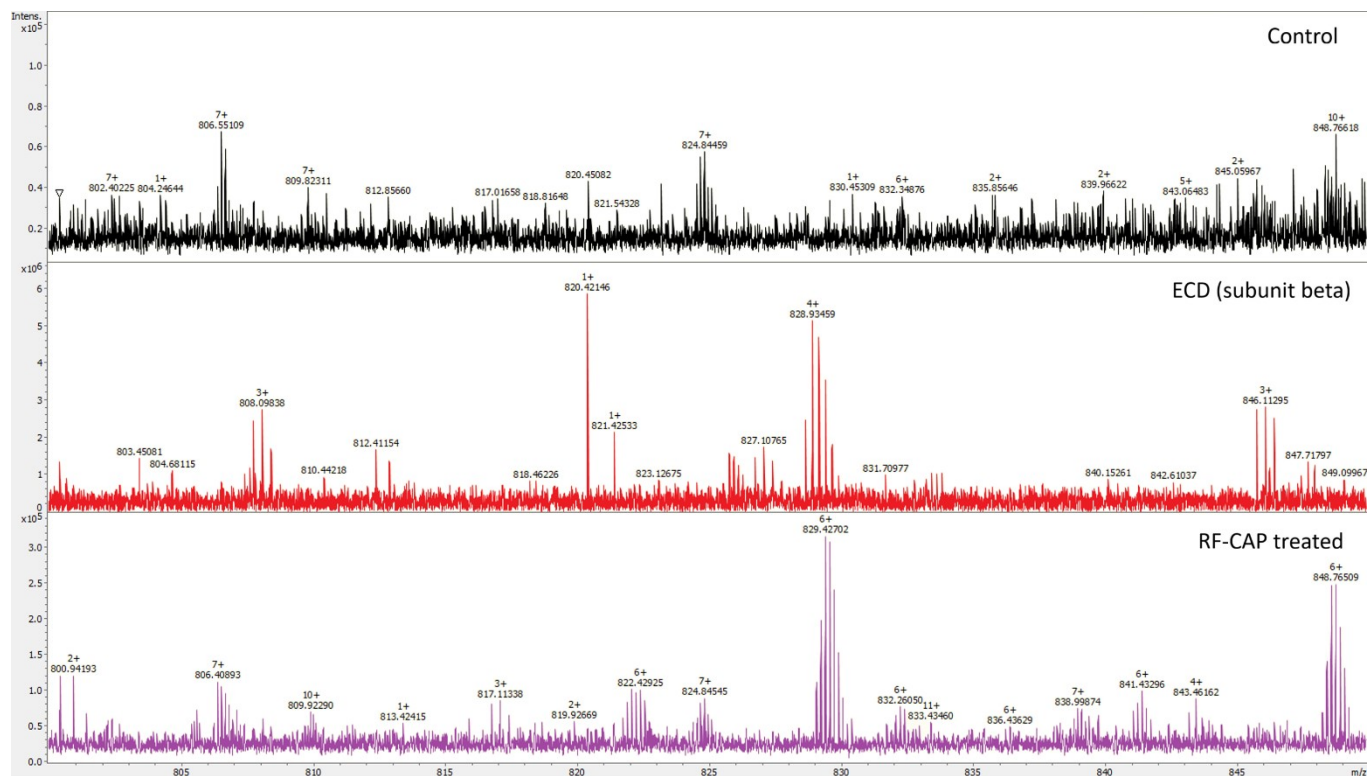

Supplementary 1.7: Comparison of 800-850 m/z range of untreated haemoglobin (top, LC-MS, 11.71-11.95 minutes), ECD spectrum of haemoglobin (middle), and haemoglobin post-plasma (bottom, LC-MS, 11.71-11.95 minutes). Several new peaks are present in the post-plasma spectrum, of which the peaks at 809, 822, 829, 838, 841, and 843 were not annotatable as abc-xyz fragments. There is a great wealth of new fragments unique to haemoglobin throughout the chromatogram.

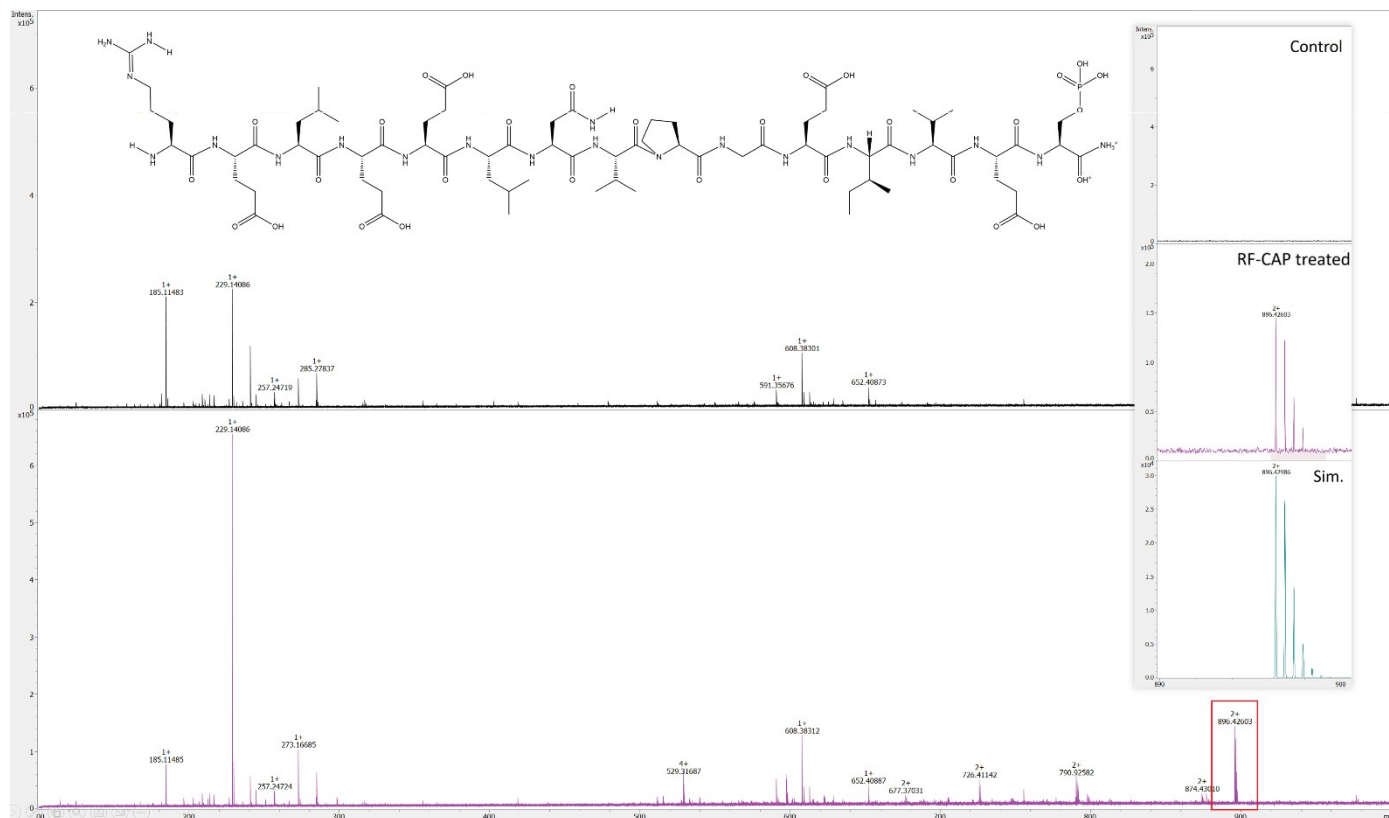

Supplementary 1.8: Comparison of 875-925 m/z range of untreated beta-casein (top) and RF-CAP-treated beta-casein (bottom) at ~8.35-8.50 min retention time. The phosphorylated fragment is highlighted in red. The neutral - HPO<sub>3</sub> loss at 856.45 is absent in the spectra and across the entire chromatogram.

Insert: Comparison of untreated beta-casein (top), RF-CAP-treated beta-casein (middle), and simulation of [c<sub>15</sub>+2H]<sup>2+</sup>, incorporating phosphorylated Ser<sub>15</sub>; the isotope distribution for this product shows good agreement with predictions (-0.56 ppm error).

Diagram: Proposed structure for [c<sub>15</sub>+2H]<sup>2+</sup>.
